# Supplementary material for: Arrow plot: a new graphical tool for selecting up and down regulated genes and genes differentially expressed on sample subgroups
Source: PubMed Central journal article supplement (PMC3542259; doi:10.1186/1471-2105-13-147), 2012-06-26
Supplement: 1471-2105-13-147-S2.pdf [file 1471-2105-13-147-S2.pdf]

| Gene name                               | Description                                                                                                                                                                                                                                                     |
|-----------------------------------------|-----------------------------------------------------------------------------------------------------------------------------------------------------------------------------------------------------------------------------------------------------------------|
| <i>BCL7A</i>                            | Chromosome 12q24.1 is the site of a recurrent breakpoint in high-grade B-cell non-Hodgkin lymphoma of the amino-terminus of <i>BCL7A</i> defined a new mechanism in the pathogenesis of a subset of high-grade B-cell non-Hodgkin lymphoma.                     |
| <i>Immunoglobulin J chain</i>           | The J chain is found in pentameric IgM, and it is also important as a secretory immunoglobulin.                                                                                                                                                                 |
| <i>MAPKKK5</i>                          | JUN N-terminal kinases (JNKs) are MAPKs that stimulate transcriptional activity of JUN in response to growth factors, proinflammatory cytokines, and certain environmental stresses.                                                                            |
| <i>Similar to KIAA0050</i>              | ACAP1 and ACAP2 were recruited to platelet-derived growth factor (PDGF)-induced dorsal membrane ruffles in NIH 3T3 mouse fibroblasts, and overexpression inhibited ruffle formation.                                                                            |
| <i>Histone deacetylase 3</i>            | Acetylation and deacetylation of histone proteins alters chromosome structure and affects transcription factor access to DNA.                                                                                                                                   |
| <i>VRK2 kinase</i>                      | Genes involved in the regulation of cell division.                                                                                                                                                                                                              |
| <i>LR11</i>                             | Is genetically associated with late-onset Alzheimer's disease and is thought to be involved in neurodegenerative processes.                                                                                                                                     |
| <i>BL34</i>                             | Sequence of a human B-cell specific immediate early gene, that is inducible in response to several B-cell activation signals.                                                                                                                                   |
| <i>Placental bikunin</i>                | Is a potent inhibitor of serine proteases involved in blood coagulation and fibrinolysis such as human plasmin, plasma and tissue kallikrein, and factor XIa.                                                                                                   |
| <i>LBR</i>                              | Encodes the lamin B receptor, an inner nuclear membrane protein that binds lamin B. Since the lamin B receptor may be a sterol reductase, loss of most <i>LBR</i> expression might lead to changes in sterol metabolism that cause developmental abnormalities. |
| <i>Immunoglobulin kappa light chain</i> | Small polypeptide subunit of an antibody. Antibodies are produced by B lymphocytes, each expressing only one class of light chain (Kappa or lambda).                                                                                                            |
| <i>BNIP3</i>                            | Activates expression of the gene encoding NIP3, in turn primes cells for apoptosis under conditions of persistent oxygen deprivation. This pathway may play a role in cell death resulting from cerebral and myocardial ischemia.                               |
| <i>CLK3 kinase</i>                      | A family of enzymes that catalyze the phosphorylation of proteins at serine and threonine residues.                                                                                                                                                             |
| <i>DNA Ligase III</i>                   | Seals DNA strand breaks that arise during the process of meiotic recombination in germ cells and as a consequence of DNA damage in somatic cells.                                                                                                               |
| <i>PARP</i>                             | Is required for cellular repair. Inhibitors of this enzyme potentiate the lethal effects of noxious agents.                                                                                                                                                     |
